# Supplementary material
Source: PubMed Central journal article supplement (PMC3429642)

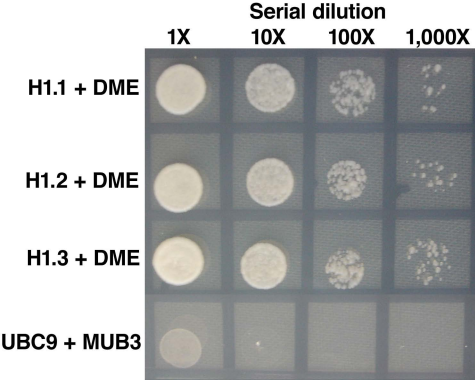

Col-0

MET1/met1-6

met1-6/met1-6

h1.2-1

h1.1-1

h1.2-1

h1.3-1

h1.1-1

h1.2-1

h1.3-1

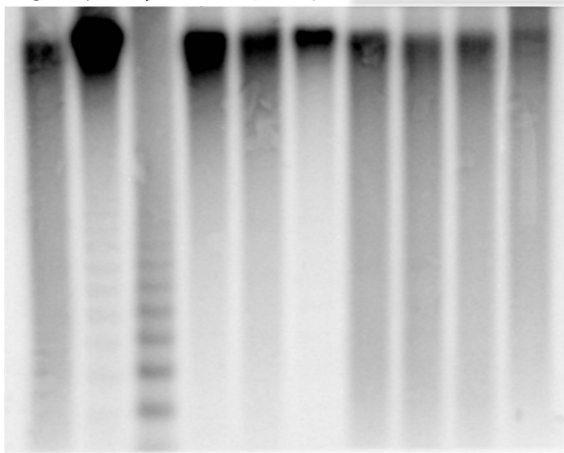

Supplement: NIHMS373589-supplement-Supp_Fig_S1-_S2.pdf [file NIHMS373589-supplement-Supp_Fig_S1-_S2.pdf]
